# Supplementary material for: Mesoporous NaYF4:Yb,Er@Au–Pt(iv)-FA nanospheres for dual-modal imaging and synergistic photothermal/chemo-anti-cancer therapy
Source: Royal Society of Chemistry journal article supplement (doi:10.1039/c5ra05437k), 2015-01-01
Supplement: c5ra05437k1.pdf [file c5ra05437k1.pdf]

## **Electronic Supplementary Information**

### **Mesoporous NaYF<sub>4</sub>:Yb,Er@Au-Pt(IV)-FA nanospheres for dual-modal imaging and synergistic photothermal/chemo- anti-cancer therapy**

Ruichan Lv, Guixin Yang, Fei He, Yunlu Dai, Shili Gai\*, and Piaoping Yang\*

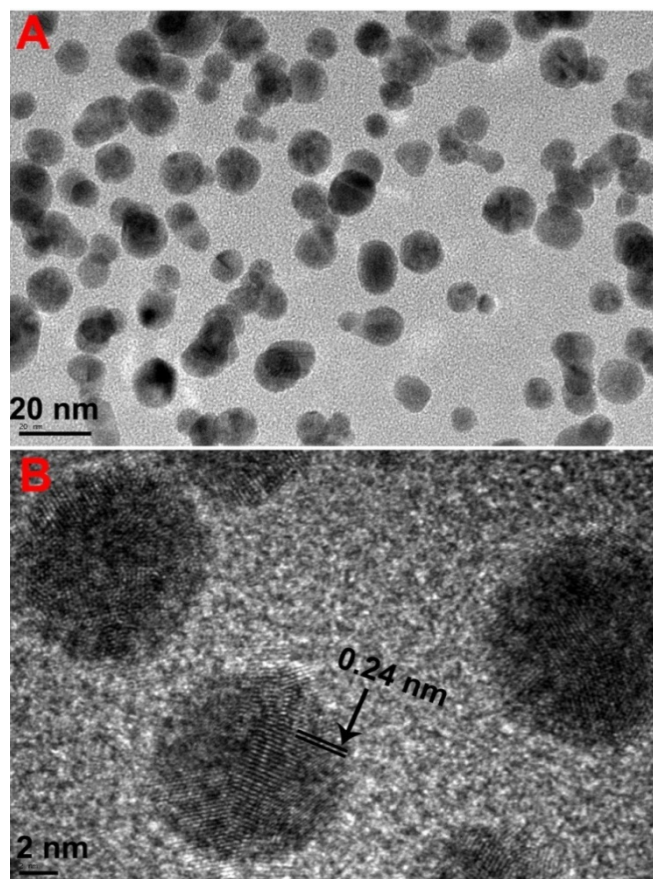

**Fig. S1** (A) TEM image and (B) HRTEM image of Au NPs.

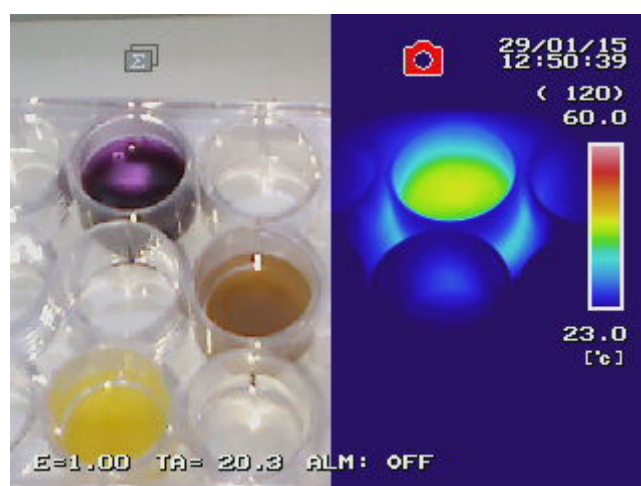

**Fig. S2** Digital photograph and the infrared thermal image of Au NPs solution after NIR irradiation for 5 min.

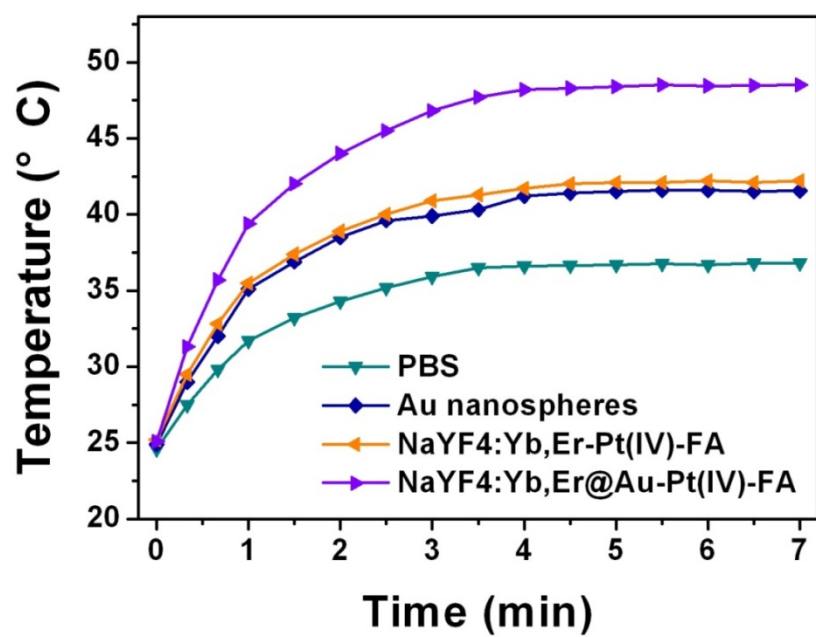

**Fig. S3** Temperature curves of the different solutions as a function of the NIR irradiation time.

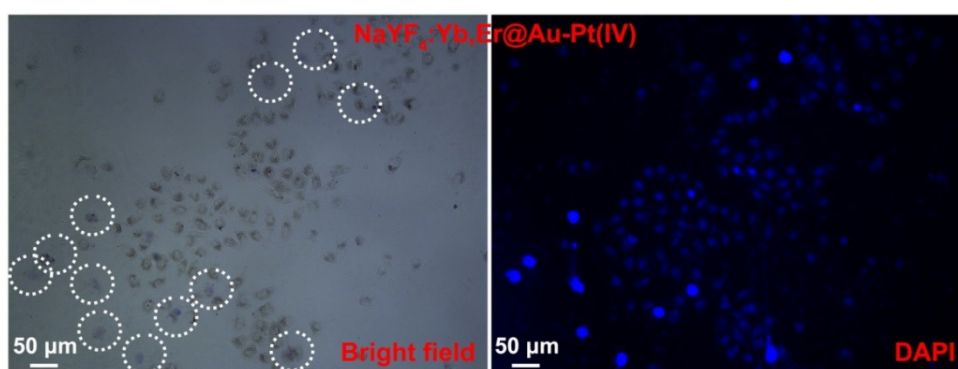

**Fig. S4** Microscope images under the bright field and fluorescence field (405 nm) of L929 cells incubated with NaYF<sub>4</sub>:Yb,Er@Au-Pt(IV) dyed by DAPI and trypan blue.

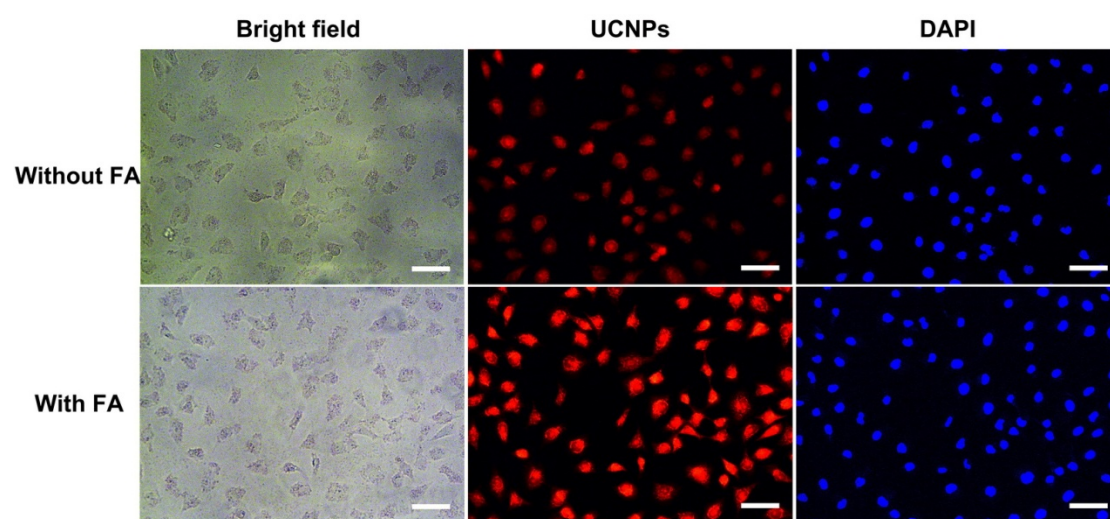

**Fig. S5** Microscopy images of HeLa cells incubated with NaYF<sub>4</sub>:Yb,Er@Au-Pt(IV) with and without FA modified for 1 h. All the scale bars are 50  $\mu$ m.

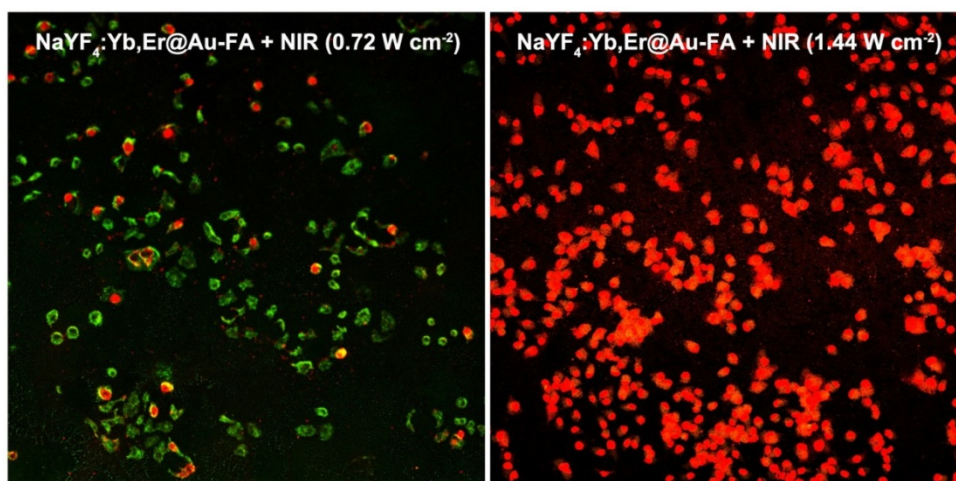

**Fig. S6** CLSM images of HeLa cells incubated with NaYF<sub>4</sub>:Yb,Er@Au-FA under NIR irradiation for 10 min with different pump powers dyed by calcein AM and PI.
